# Supplementary material for: MEF2C and EBF1 Co-regulate B Cell-Specific Transcription
Source: PubMed Central journal article supplement (PMC4762780; doi:10.1371/journal.pgen.1005845), 2016-02-22
Supplement: pgen.1005845.s009.pdf [file pgen.1005845.s009.pdf]

| <b>MEF2C Rabbit Pre-B</b> |                  |                  |              |
|---------------------------|------------------|------------------|--------------|
| <b>Gene name</b>          |                  |                  |              |
| <b>Chromosome</b>         | <b>Start</b>     | <b>End</b>       | <b>Score</b> |
| <b><i>Mef2c</i></b>       | <b>83504036</b>  | <b>83667079</b>  |              |
| Chr13                     | 83439664         | 83439831         | 190.85       |
| Chr13                     | 83621470         | 83621623         | 104.81       |
| Chr13                     | 83662477         | 83662633         | 208.11       |
| <b><i>Ebf1</i></b>        | <b>44618134</b>  | <b>45005172</b>  |              |
| Chr11                     | 44592540         | 44592649         | 112.85       |
| Chr11                     | 44612716         | 44612794         | 81.12        |
| Chr11                     | 44622808         | 44622951         | 83.94        |
| Chr11                     | 44762985         | 44763049         | 106.29       |
| Chr11                     | 44813967         | 44814175         | 211.36       |
| Chr11                     | 44889124         | 44889241         | 152.63       |
| Chr11                     | 44910549         | 44910769         | 108.64       |
| Chr11                     | 44940837         | 44940969         | 68.54        |
| Chr11                     | 45005699         | 45005820         | 97.15        |
| Chr11                     | 45024128         | 45024225         | 136.53       |
| Chr11                     | 45071954         | 45072075         | 106.3        |
| <b><i>Foxo1</i></b>       | <b>52268337</b>  | <b>52350109</b>  |              |
| Chr3                      | 52216519         | 52216666         | 89.95        |
| Chr3                      | 52315577         | 52315766         | 246.24       |
| Chr3                      | 52350823         | 52351017         | 94.56        |
| <b><i>Ets1</i></b>        | <b>32696042</b>  | <b>32757820</b>  |              |
| Chr9                      | 32648797         | 32648973         | 223.71       |
| Chr9                      | 32744440         | 32744583         | 82.75        |
| Chr9                      | 32870615         | 32870750         | 96.83        |
| <b><i>Myb</i></b>         | <b>21124930</b>  | <b>21160984</b>  |              |
| Chr10                     | 21146678         | 21146832         | 82.14        |
| Chr10                     | 21165900         | 21166156         | 309.57       |
| <b><i>Bcl6</i></b>        | <b>23965052</b>  | <b>23988612</b>  |              |
| Chr16                     | 24067153         | 24067337         | 134.01       |
| <b><i>Pax5</i></b>        | <b>44531506</b>  | <b>44710440</b>  |              |
| Chr4                      | 44528216         | 44528345         | 83.48        |
| Chr4                      | 44583444         | 44583568         | 144.85       |
| Chr4                      | 44637829         | 44638030         | 117          |
| <b><i>Pou2af1</i></b>     | <b>51213690</b>  | <b>51240079</b>  |              |
| Chr9                      | 51227028         | 51227154         | 59.46        |
| Chr9                      | 51247409         | 51247706         | 336.88       |
| <b><i>Cobll1</i></b>      | <b>65088339</b>  | <b>65238626</b>  |              |
| Chr2                      | 65191595         | 65191681         | 68.54        |
| Chr2                      | 65213879         | 65214004         | 106.83       |
| <b><i>(Rag1)</i></b>      | <b>101638252</b> | <b>101649532</b> |              |
| Chr2                      | 101287448        | 101287569        | 70.9         |

|               |                 |                 |        |
|---------------|-----------------|-----------------|--------|
| <b>Mbd2</b>   | <b>70568292</b> | <b>70626131</b> |        |
| Chr18         | 70583585        | 70583755        | 91.77  |
| Chr18         | 70630318        | 70630491        | 72.4   |
| <b>Notch2</b> | <b>98013538</b> | <b>98150367</b> |        |
| Chr3          | 98045968        | 98046043        | 91.24  |
| Chr3          | 98088984        | 98089151        | 123.47 |
| <b>Lrrn3</b>  | <b>41451668</b> | <b>41486057</b> |        |
| Chr12         | 41439250        | 41439374        | 77.98  |
| Chr12         | 41499273        | 41499344        | 94.59  |

**MEF2C Goat Pre-B**

| <b>Gene name</b> | <b>Start</b>    | <b>End</b>      | <b>Score</b> |
|------------------|-----------------|-----------------|--------------|
| <b>Mef2c</b>     | <b>83504036</b> | <b>83667079</b> |              |
| Chr13            | 83439552        | 83439755        | 95.14        |
| Chr13            | 83632975        | 83633455        | 61.69        |
| Chr13            | 83653838        | 83654020        | 164.43       |
| Chr13            | 83662322        | 83662634        | 2070.39      |
| <b>Ebf1</b>      | <b>44618134</b> | <b>45005172</b> |              |
| Chr11            | 44612617        | 44612850        | 56.85        |
| Chr11            | 44621897        | 44622108        | 112          |
| Chr11            | 44658207        | 44658405        | 133.46       |
| Chr11            | 44696721        | 44696966        | 68.67        |
| Chr11            | 44715900        | 44716133        | 57.05        |
| Chr11            | 44814026        | 44814273        | 392.34       |
| Chr11            | 44996874        | 44997171        | 81.08        |
| Chr11            | 45009591        | 45009777        | 122.4        |
| Chr11            | 45064699        | 45064925        | 80.81        |
| <b>Foxo1</b>     | <b>52268337</b> | <b>52350109</b> |              |
| Chr3             | 52216428        | 52216610        | 127.07       |
| Chr3             | 52306524        | 52306966        | 54.6         |
| Chr3             | 52315642        | 52315867        | 112          |
| Chr3             | 52378800        | 52379017        | 128.18       |
| <b>Ets1</b>      | <b>32696042</b> | <b>32757820</b> |              |
| chr9             | 32648815        | 32649050        | 223.47       |
| chr9             | 32656623        | 32657085        | 220.88       |
| chr9             | 32668703        | 32669056        | 62.7         |
| chr9             | 32787807        | 32788054        | 188.52       |
| <b>Myb</b>       | <b>21124930</b> | <b>21160984</b> |              |
| Chr10            | 21110433        | 21110606        | 133.46       |
| Chr10            | 21165985        | 21166229        | 161.72       |
| <b>Bcl6</b>      | <b>23965052</b> | <b>23988612</b> |              |
| Chr16            | 24067184        | 24067383        | 171.48       |
| <b>Pax5</b>      | <b>44531506</b> | <b>44710440</b> |              |
| Chr4             | 44528120        | 44528313        | 56.85        |

|                |                  |                  |        |
|----------------|------------------|------------------|--------|
| Chr4           | 44537805         | 44537999         | 85.07  |
| Chr4           | 44579352         | 44579601         | 128.18 |
| Chr4           | 44583373         | 44583559         | 112    |
| Chr4           | 44642874         | 44643285         | 58.9   |
| Chr4           | 44695136         | 44695444         | 91.02  |
| <b>Pou2af1</b> | <b>51213690</b>  | <b>51240079</b>  |        |
| Chr9           | 51247315         | 51247549         | 638.58 |
| <b>Cobll1</b>  | <b>65088339</b>  | <b>65238626</b>  |        |
| Chr2           | 65182170         | 65182350         | 296.06 |
| Chr2           | 65182660         | 65182837         | 138.4  |
| Chr2           | 65191456         | 65191650         | 96.29  |
| Chr2           | 65213825         | 65214002         | 144.76 |
| <b>(Rag1)</b>  | <b>101638252</b> | <b>101649532</b> |        |
| Chr2           | 101519279        | 101519538        | 138.22 |
| Chr2           | 101670033        | 101670225        | 105.34 |
| <b>Mbd2</b>    | <b>70568292</b>  | <b>70626131</b>  |        |
| Chr18          | 70585261         | 70585490         | 84.24  |
| Chr18          | 70594704         | 70595246         | 103.81 |
| Chr18          | 70647441         | 70647789         | 59.65  |
| <b>Notch2</b>  | <b>98013538</b>  | <b>98150367</b>  |        |
| Chr3           | 98056082         | 98056273         | 105.34 |
| Chr3           | 98088939         | 98089204         | 149.61 |
| <b>Lrrn3</b>   | <b>41451668</b>  | <b>41486057</b>  |        |
| Chr12          | 41499051         | 41499392         | 92.41  |

#### EBF1 Goat Pre-B

| Gene name    | Start           | End             | Score  |
|--------------|-----------------|-----------------|--------|
| <b>Mef2c</b> | <b>83504036</b> | <b>83667079</b> |        |
| Chr13        | 83439712        | 83439862        | 98.6   |
| Chr13        | 83440925        | 83440988        | 137.43 |
| Chr13        | 83537014        | 83537107        | 83.27  |
| Chr13        | 83629192        | 83629280        | 56.7   |
| Chr13        | 83653840        | 83653912        | 100.37 |
| Chr13        | 83662443        | 83662629        | 164.14 |
| <b>Ebf1</b>  | <b>44618134</b> | <b>45005172</b> |        |
| Chr11        | 44612581        | 44612871        | 125.88 |
| Chr11        | 44632112        | 44632199        | 83.27  |
| Chr11        | 44691384        | 44691503        | 63.54  |
| Chr11        | 44693875        | 44693975        | 69.48  |
| Chr11        | 44772352        | 44772414        | 137.43 |
| Chr11        | 44814015        | 44814186        | 347.42 |
| Chr11        | 45012936        | 45013090        | 50.81  |
| Chr11        | 45088511        | 45088577        | 321.26 |

|                       |                  |                  |         |
|-----------------------|------------------|------------------|---------|
| <b><i>Foxo1</i></b>   | <b>52268337</b>  | <b>52350109</b>  |         |
| Chr3                  | 52200141         | 52200266         | 66.43   |
| Chr3                  | 52286239         | 52286321         | 100.77  |
| Chr3                  | 52350842         | 52351018         | 119.33  |
| Chr3                  | 52358650         | 52358800         | 62.73   |
| Chr3                  | 52378822         | 52378914         | 83.27   |
| <b><i>Ets1</i></b>    | <b>32696042</b>  | <b>32757820</b>  |         |
| Chr9                  | 32688888         | 32688957         | 77.11   |
| Chr9                  | 32691959         | 32692051         | 56.7    |
| <b><i>Myb</i></b>     | <b>21124930</b>  | <b>21160984</b>  |         |
| Chr10                 | 21147185         | 21147313         | 79.38   |
| Chr10                 | 21149237         | 21149370         | 95.08   |
| Chr10                 | 21166025         | 21166147         | 215.94  |
| <b><i>Bcl6</i></b>    | <b>23965052</b>  | <b>23988612</b>  |         |
| Chr16                 | 24067176         | 24067326         | 161.27  |
| <b><i>Pax5</i></b>    | <b>44531506</b>  | <b>44710440</b>  |         |
| Chr4                  | 44528224         | 44528396         | 103.24  |
| Chr4                  | 44537510         | 44537715         | 83.57   |
| Chr4                  | 44549532         | 44549665         | 62.4    |
| <b><i>Pou2af1</i></b> | <b>51213690</b>  | <b>51240079</b>  |         |
| Chr9                  | 51247399         | 51247608         | 1205.89 |
| <b><i>Cobll1</i></b>  | <b>65088339</b>  | <b>65238626</b>  |         |
| Chr2                  | 65219694         | 65219785         | 100.77  |
| <b><i>(Rag1)</i></b>  | <b>101638252</b> | <b>101649532</b> |         |
| Chr2                  | 101616586        | 101616678        | 137.43  |
| Chr2                  | 101623441        | 101623547        | 63.54   |
| Chr2                  | 101670178        | 101670286        | 54.99   |
| <b><i>Mbd2</i></b>    | <b>70568292</b>  | <b>70626131</b>  |         |
| Chr18                 | 70573544         | 70573681         | 81.13   |
| Chr18                 | 70593291         | 70593374         | 100.77  |
| Chr18                 | 70615149         | 70615269         | 66.43   |
| Chr18                 | 70630347         | 70630509         | 93.26   |
| Chr18                 | 70630878         | 70631016         | 64.5    |
| <b><i>Notch2</i></b>  | <b>98013538</b>  | <b>98150367</b>  |         |
| Chr3                  | 98056048         | 98056165         | 54.99   |
| Chr3                  | 98066265         | 98066344         | 100.77  |
| Chr3                  | 98088922         | 98089122         | 287.85  |
| <b><i>Lrrn3</i></b>   | <b>41451668</b>  | <b>41486057</b>  |         |
| Chr12                 | 41454096         | 41454200         | 156.47  |
| Chr12                 | 41491143         | 41491206         | 132.18  |
| Chr12                 | 41499288         | 41499434         | 207.7   |
