# Supplementary material for: MEF2C and EBF1 Co-regulate B Cell-Specific Transcription
Source: PubMed Central journal article supplement (PMC4762780; doi:10.1371/journal.pgen.1005845), 2016-02-22
Supplement: pgen.1005845.s010.pdf [file pgen.1005845.s010.pdf]

| <b>MEF2C Rabbit HPC</b>         |                 |                 |              |
|---------------------------------|-----------------|-----------------|--------------|
| <b>Gene Name<br/>Chromosome</b> | <b>Start</b>    | <b>End</b>      | <b>Score</b> |
| <b><i>Mef2c</i></b>             | <b>83504036</b> | <b>83667079</b> |              |
| Chr13                           | 83095796        | 83095948        | 189.05       |
| Chr13                           | 83439637        | 83439765        | 115.57       |
| Chr13                           | 83592757        | 83592931        | 120.22       |
| Chr13                           | 83633042        | 83633259        | 84.88        |
| Chr13                           | 83662358        | 83662635        | 863.11       |
| <b><i>Ebf1</i></b>              | <b>44618134</b> | <b>45005172</b> |              |
| Chr11                           | 44811824        | 44811926        | 151.5        |
| Chr11                           | 44889116        | 44889226        | 94.98        |
| <b><i>Foxo1</i></b>             | <b>52268337</b> | <b>52350109</b> |              |
| Chr3                            | 52216499        | 52216678        | 98.12        |
| Chr3                            | 52350832        | 52351037        | 102.65       |
| <b><i>Ets1</i></b>              | <b>32696042</b> | <b>32757820</b> |              |
| Chr9                            | 32648874        | 32648995        | 179.77       |
| <b><i>Myb</i></b>               | <b>21124930</b> | <b>21160984</b> |              |
| Chr10                           | 21165944        | 21166178        | 133.8        |
| <b><i>Pou2af1</i></b>           | <b>51213690</b> | <b>51240079</b> |              |
| Chr9                            | 51247396        | 51247565        | 198.57       |
| <b><i>Bcl11a</i></b>            |                 |                 |              |
| Chr11                           | 24207463        | 24207633        | 107.14       |
| <b><i>Bach2</i></b>             | <b>32417435</b> | <b>32586108</b> |              |
| Chr4                            | 32202478        | 32202651        | 102.72       |
| <b><i>Notch2</i></b>            | <b>98013538</b> | <b>98150367</b> |              |
| Chr3                            | 98056079        | 98056188        | 94.48        |
| Chr3                            | 98088953        | 98089124        | 76.71        |

| <b>MEF2C Goat HPC</b>           |              |            |              |
|---------------------------------|--------------|------------|--------------|
| <b>Gene Name<br/>Chromosome</b> | <b>Start</b> | <b>End</b> | <b>Score</b> |
| <b><i>Mef2c</i></b>             |              |            |              |
| Chr13                           | 83095823     | 83096020   | 3100         |
| Chr13                           | 83140723     | 83140818   | 2610.74      |
| Chr13                           | 83187537     | 83187664   | 3100         |
| Chr13                           | 83206750     | 83206825   | 2269.81      |
| Chr13                           | 83210243     | 83210431   | 3100         |
| Chr13                           | 83238826     | 83238951   | 1468.79      |
| Chr13                           | 83281792     | 83281958   | 3100         |
| Chr13                           | 83439660     | 83439838   | 3100         |
| Chr13                           | 83491920     | 83492060   | 1760.66      |
| Chr13                           | 83512647     | 83512731   | 2991.2       |
| Chr13                           | 83524098     | 83524213   | 1193.92      |

|              |                 |                 |         |
|--------------|-----------------|-----------------|---------|
| Chr13        | 83585718        | 83585788        | 2009.09 |
| Chr13        | 83621455        | 83621606        | 3100    |
| Chr13        | 83662524        | 83662636        | 3100    |
| Chr13        | 83667139        | 83667188        | 3100    |
| <b>Ebf1</b>  | <b>44618134</b> | <b>45005172</b> |         |
| Chr11        | 44592532        | 44592592        | 3047.91 |
| Chr11        | 44605936        | 44606050        | 1532.59 |
| Chr11        | 44612662        | 44612913        | 3100    |
| Chr11        | 44622794        | 44622858        | 2501.55 |
| Chr11        | 44622903        | 44622954        | 3100    |
| Chr11        | 44640403        | 44640456        | 3228.29 |
| Chr11        | 44653594        | 44653686        | 1493.4  |
| Chr11        | 44658206        | 44658281        | 3100    |
| Chr11        | 44715967        | 44716052        | 1532.64 |
| Chr11        | 44762872        | 44763041        | 2817.81 |
| Chr11        | 44773083        | 44773225        | 3100    |
| Chr11        | 44811770        | 44811908        | 3034.26 |
| Chr11        | 44813998        | 44814154        | 3100    |
| Chr11        | 44823311        | 44823390        | 1777.19 |
| Chr11        | 44844046        | 44844110        | 2644.66 |
| Chr11        | 44847634        | 44847753        | 1366.37 |
| Chr11        | 44858405        | 44858466        | 2780.85 |
| Chr11        | 44861720        | 44861772        | 3178.93 |
| Chr11        | 44889158        | 44889281        | 1126.1  |
| Chr11        | 44897430        | 44897479        | 3100    |
| Chr11        | 44910591        | 44910740        | 3100    |
| Chr11        | 44931970        | 44932109        | 1516.3  |
| Chr11        | 44936642        | 44936741        | 1568.26 |
| Chr11        | 44940835        | 44940936        | 3100    |
| Chr11        | 44983627        | 44983701        | 2259.12 |
| Chr11        | 44993469        | 44993554        | 1567.18 |
| Chr11        | 45005785        | 45005854        | 2004.4  |
| Chr11        | 45023931        | 45024050        | 1441.57 |
| Chr11        | 45024153        | 45024264        | 1468.79 |
| Chr11        | 45046365        | 45046476        | 2250.59 |
| Chr11        | 45062756        | 45062816        | 3100    |
| Chr11        | 45071947        | 45072030        | 3100    |
| <b>Foxo1</b> | <b>52268337</b> | <b>52350109</b> |         |
| Chr3         | 52216535        | 52216714        | 3100    |
| Chr3         | 52271424        | 52271506        | 3100    |
| Chr3         | 52287927        | 52288029        | 1577.57 |
| Chr3         | 52315620        | 52315764        | 3100    |
| Chr3         | 52350828        | 52350998        | 3100    |
| Chr3         | 52364798        | 52364865        | 2517.61 |
| Chr3         | 52378827        | 52378917        | 3100    |

|                       |                 |                 |         |
|-----------------------|-----------------|-----------------|---------|
| <b><i>Ets1</i></b>    | <b>32696042</b> | <b>32757820</b> |         |
| Chr9                  | 32637873        | 32637935        | 2684.07 |
| Chr9                  | 32648810        | 32648968        | 3100    |
| Chr9                  | 32656157        | 32656282        | 1468.79 |
| Chr9                  | 32656944        | 32657053        | 3100    |
| Chr9                  | 32673412        | 32673553        | 1264.91 |
| Chr9                  | 32700555        | 32700605        | 3100    |
| Chr9                  | 32706803        | 32706897        | 2471.63 |
| Chr9                  | 32722818        | 32722908        | 1560.08 |
| Chr9                  | 32751736        | 32751836        | 2189.53 |
| Chr9                  | 32787956        | 32788009        | 3208.53 |
| <b><i>Myb</i></b>     | <b>21124930</b> | <b>21160984</b> |         |
| Chr10                 | 21150192        | 21150287        | 1957.68 |
| Chr10                 | 21165912        | 21166138        | 3100    |
| <b><i>Bcl6</i></b>    | <b>23965052</b> | <b>23988612</b> |         |
| Chr16                 | 24056442        | 24056611        | 3100    |
| Chr16                 | 24065233        | 24065309        | 3100    |
| Chr16                 | 24067218        | 24067310        | 3100    |
| <b><i>Ilf7r</i></b>   | <b>9506159</b>  | <b>9529876</b>  |         |
| Chr15                 | 9491386         | 9491435         | 3100    |
| <b><i>Pax5</i></b>    | <b>44531506</b> | <b>44710440</b> |         |
| Chr4                  | 44528216        | 44528401        | 3100    |
| Chr4                  | 44537490        | 44537620        | 3100    |
| Chr4                  | 44537706        | 44537772        | 2665.78 |
| Chr4                  | 44559647        | 44559758        | 1468.79 |
| Chr4                  | 44579479        | 44579565        | 3100    |
| Chr4                  | 44583411        | 44583578        | 3100    |
| Chr4                  | 44590471        | 44590537        | 3100    |
| <b><i>Pou2af1</i></b> | <b>51213690</b> | <b>51240079</b> |         |
| Chr9                  | 51217413        | 51217571        | 3100    |
| Chr9                  | 51231893        | 51231957        | 2534.67 |
| Chr9                  | 51247415        | 51247608        | 3100    |
| <b><i>Bcl11a</i></b>  | <b>24078056</b> | <b>24168435</b> |         |
| Chr11                 | 24106460        | 24106513        | 3100    |
| Chr11                 | 24114279        | 24114386        | 1492.4  |
| <b><i>Cobll1</i></b>  | <b>65088339</b> | <b>65238626</b> |         |
| Chr2                  | 65182278        | 65182403        | 3100    |
| Chr2                  | 65189547        | 65189602        | 3100    |
| Chr2                  | 65191140        | 65191219        | 3100    |
| Chr2                  | 65191559        | 65191692        | 3100    |
| Chr2                  | 65213872        | 65213946        | 2291.31 |
| <b><i>Bach2</i></b>   | <b>32417435</b> | <b>32586108</b> |         |
| Chr4                  | 32202450        | 32202620        | 3100    |
| Chr4                  | 32202695        | 32202762        | 2627.51 |
| Chr4                  | 32222517        | 32222699        | 3100    |

|               |                  |                  |         |
|---------------|------------------|------------------|---------|
| Chr4          | 32233919         | 32234037         | 1420.35 |
| Chr4          | 32258443         | 32258508         | 3100    |
| Chr4          | 32293886         | 32293935         | 3203.53 |
| Chr4          | 32304956         | 32305023         | 2175.02 |
| Chr4          | 32365768         | 32365866         | 3100    |
| Chr4          | 32389660         | 32389919         | 3100    |
| Chr4          | 32463105         | 32463180         | 1741.96 |
| Chr4          | 32488259         | 32488390         | 1233.84 |
| <b>Lig4</b>   | <b>9970020</b>   | <b>9976323</b>   |         |
| Chr8          | 9898924          | 9899063          | 3100    |
| Chr8          | 9930221          | 9930353          | 1405.1  |
| Chr8          | 9988032          | 9988169          | 2590.44 |
| <b>Rag1</b>   | <b>101638252</b> | <b>101649532</b> |         |
| Chr2          | 101613727        | 101613792        | 3100    |
| Chr2          | 101628511        | 101628560        | 3100    |
| Chr2          | 101641928        | 101642010        | 1927.44 |
| Chr2          | 101644469        | 101644660        | 3100    |
| Chr2          | 101649027        | 101649077        | 3100    |
| Chr2          | 101670157        | 101670219        | 2432.37 |
| <b>Mbd2</b>   | <b>70568292</b>  | <b>70626131</b>  |         |
| Chr18         | 70572856         | 70572990         | 1153.83 |
| Chr18         | 70576866         | 70576948         | 2916.09 |
| Chr18         | 70578672         | 70578751         | 3100    |
| Chr18         | 70630405         | 70630506         | 1361.46 |
| <b>Notch2</b> | <b>98013538</b>  | <b>98150367</b>  |         |
| Chr3          | 98039681         | 98039799         | 1193.92 |
| Chr3          | 98056093         | 98056171         | 3100    |
| Chr3          | 98084272         | 98084397         | 1193.92 |
| Chr3          | 98088972         | 98089100         | 3100    |
| <b>Lrrn3</b>  | <b>41451668</b>  | <b>41486057</b>  |         |
| Chr12         | 41439226         | 41439374         | 3100    |
| Chr12         | 41439527         | 41439616         | 1582.03 |
| Chr12         | 41441221         | 41441310         | 1540.18 |
| Chr12         | 41453020         | 41453100         | 1729.38 |
| Chr12         | 41454084         | 41454230         | 3100    |
| Chr12         | 41466859         | 41466911         | 3100    |
| Chr12         | 41499285         | 41499421         | 2474.89 |
