# Supplementary material for: MEF2C and EBF1 Co-regulate B Cell-Specific Transcription
Source: PubMed Central journal article supplement (PMC4762780; doi:10.1371/journal.pgen.1005845), 2016-02-22
Supplement: pgen.1005845.s011.pdf [file pgen.1005845.s011.pdf]

*Il7ra*

GGGGATTGCATTGAATCTGTAGATTGCTTTTGGCAAGATAGCCATTTTTACA  
ATGTTGATCCTGCCAATCCATGAGCATGGGAGATCTTCCATCTTCTGAGAT  
CTTCTTTAATTTCTTCCTTCAGAGATTTGAAGTTTTTATCATAACACATCTTTCA  
CTTCCTTAGTTAGAGTCACGCCAAGATATTTTATATTATTTGTGACTATTGAG  
AAGGGTGTGTTTCCCTAATTTCTTTCTCAGCCTGTTT**ATTCTTTGTATAGAG**  
**AAAGGCC**ATTGACTTGTTTGGAGTTTATTTTATATCCAGCTACTTCACCGAAG  
CTGTTTATCAGGTTTAGGAGTTCT**CTGGTAGAATTTTTAGGGTCACTT**TATAT  
ATACTATCATATCATCTGCAAAAAGTGATATTTTGACTTCTTTTCCAATTT  
GTATCCCCTTGATCTCCTTTTGTGTCGAATTGCTCTGGCTAATACTTCAAGT  
ACTATGTTGAAAAGGTAGGGAGAAAAGTGGGCAGCCTTGCTAGTCCCTGAT  
TTTAGTGGGATTGCTTCCAGCTTCTCTCATTACTTTGATGTTGGCTACTGG  
TTTGCTGTAGATTGCTTTTATCATGTTTAGGTACGGGCCTTGAATTCCTGATC  
TTTCCAAAACTTTTATCATGAATGGGTGTTGGATCTTG

*Ebf1*

GGCTGAACTAAGCTTTGGTGAATTCAGATACCTTGACTT**GGGGACCTGGAA**  
**ATAGCAGTG**TTTTTTCATGGGGACAGTGAGGTCCTCTTTAAAAGAGAAGGCA  
AGACAGAATCTAAAGATACGCTACTGGATTTTTAGAGGTACTGTGGAATGTC  
TCAAAGATTCTCAAATGCAGGAATTCTGGGGTTCTAGGCTGTCCTCTTGACA  
GATGACATGTCTCTGAGCCATTGGGATTGACTGAGTCACATCCTAGCTCTAC  
TGATGACTGTGTGTAGCCTCTGCCTTTAATGTTACTGTGTAAAGACTGGGA  
AGACCTGTTAGATCTGGGATGTGGATTAATAACTGAAGTTTATGATGGAT  
GTTCTTGGTGTCACTAAGTTCCTATTAAGCGACAGTTGCTATTGTGCTCAA  
TGCTTTCATGGCTGCTGTTATCATCATCAAGACTGAGAGACTTGCTTTAGGG  
ATATTGCCTGTTGAGACTTTCTCTAGGGAGTACAAGTCAATATAACCAGTTGA  
GAAACAGGTGATGACTACCTGGTAGAAAAATAACCAAGGCCTGCATACATG  
CTACTTATCTCCAGACTCTGGGCCAGGAATTCACACAAAAAAGAACAATAT  
GGGCAGCTTTTCTCAATGCCCATGGCAGTTCGTATTATCTTCTCTTTTTAA  
ACTGCATTTAGTATTGATCAAAATTTGATCTCCCTAGGAAAGAAAAATGTATT  
GGAGGGTGATAA**GGGACAAATAGCA**ATATGATTTGTTTAGAA**CCCC**CAGC  
TCCAGCATCTTCCAGATCACCTCAATCCCCAGAGGT

*Foxo1*

TAGTAGCCTGGGCTGCAGTTTGTGTTCTCTTAGTGTCTGTATAACATCTGTC  
CAGGCTCTTCTGGCTTTTCATAGTCTCTGGTGAAAAATCTGGTGTAATTCTGA  
TAGGCTTGCCTTTATATGTTACTTGACCTTTTT**CCCTTACTGCTTTTAGTATT**  
**CTATCTTTATTTAGTGC**ATTTGATGTTCTGATTATTATGTGTCGGGAGGAATT  
TCTTTTCTGGTCCAGTCTATTTGGAGTTCTGTAGGCTTCTTGTATGTTTCATAT  
GCATCTCATTCTTTAGATTTGGGAAGTTTTCTTCAATAATTTTGTGGAAGATG  
TTTGCTGGACCTTTGAGTTGAAAATCTTCATTCTCATCCACTCCTATTATCCG  
TACGTTTGGTCTTCTTATTGTGTCCTGGATTTCTGGATATTTTGGAGTTAGGA  
TCTTTTTGCATTTTCCATTTTCTTTGATTGTTGTGCCGATGTTCTCTATGGAAT  
CTTCTGCACCTGAGATTCTCTCTTCCATCTCTTGTATTCTGTTGCTGATGCTC  
AAATCTATGGTTCCAGATTTCTTTCCTAGGGTTTCTATCTCTAGTGTTGCCTC  
GCTTTGAGTTTTCTTATTGTGCT**ACTTCCCTTTTTAGGTCTAGT**ATGGTTT

TGTTCAATTTCCATCACCTGTTTGTATGTTTTTTCCTCTTTTTCTGTAAGGACTT  
CTACCTGTTTGATTGTGTTTTCTGTTTTTCTTTAAGGACTTGTAAGTCTTTAG  
CAGTGTTCCTGTATTTCTTTAAGTGATTTATTAAAGTCCTTCTTGATGTCCT  
CTACCATCATCATGAGATATGCTTTTAAATCTAGGTCTAGGTCTCAGGTGT  
GTTGGGGTCCCCTGGACTGGGCGAAGTGGGTGTGCTGGGTTCTGGTGATG  
GTGAGTGGTCTTGGTTCCTGTTAGTAAGATTCCCTCCGTTTACCTTTTCGCCAT  
CTGGTAATCTCTGGAGTTAGTAGTTATAGTTGACTCTGTTTAGAGATTGTTCT  
TCTGGTGATTCTGTTACCGTCTATCAGCAGACCTGGGAGACAGATTCTCTCC  
TCTGAGTTTCAGTGCTCAGAGCACTCTCTGCTGGCAAGCTCTCTTACAGGG  
AAGGTGCGCAGATATCTTGTATTTGGACCTCCTCCTGGCCGAAGAAGAAGG  
CCAAAACAGGACCTTTCTCAGACACTGTGTTGCTTTGGCAGTTCCAGGT  
GGTACAGACTCTCACCTAAGCAGACTAAATTCCCTAAGTTCCTTGGAGTCCCG  
GGACCAAGATGGCGACCGCTGCTGCTGTGGCTTAGGCCGCCTCCCAGCC  
GGGTGGGCACCTGTCCTCCGGTCCGGAAGGTGGCCGGCTGTCCCCGGCC  
CACACAGGGTGCTGCCTCAGCCCCTCTGTGCTTCTGCCTGTTCCAGAAGCT  
GTCAGGTTCTCTGGCGCACCTCTCACCTGTTTCAGACTAATTCCTAAGTTC  
GGCGGGTCCCGGACCAAGATGGCGACCGCTGCTGCTGTGGCTTAGGCCGC  
CTCCCCAGCCGGGCGGGCACCTGTCTCCGGTTCGGACGGTGGCCGGCT  
GTCCCCGGCCACACAGGGTGCTGCCTCAGCGCCTCTGTGCTTCTGCCTG  
TTCAGAAGCTGTCAGGTTCTCTGGCGCACCTCTCACCTGTTTCAGACTAAT  
TTCCTAAGTTAGGCGGGTCTCGGACCAAGATGGCGACCGCTGCTGCTGTG  
GCTTAGGCCGCCTCCCCAGCTGGGTGGGCACCTGTCCTCCGGTCCGGAAG  
GTGGCCGGCTGTCCCCGGCCACACAGGGTGCTGCCTCAGCCCCTCTGTG  
CTTCTGCCTGTTCCAGAGGCTGTCAGGTTCTCTGGCGCACCTCTCACCTG  
TTCAGACTAATTCCTAAGTTCGGCGGGTCCCGGACCCTACAAAATTTTTAA  
ATTTTGTTTTTCTTGAGGATGTCACACATGAGTATACTGTATAAATTGTTTTCA  
TCTGTCCGTCTCTCTGACTCCTTCCATTTTCTCTCCTGTCTCTCAAATTCAT  
GACCTCCTCTATAGCTAGTGTGTGCATACATGTGTGTGTACATACCACACA  
CACACACACACACACACACACACACACACACACACACACTACTGAGTCC  
AGTGCTCATCTCTGGAGAAAAGTACTCTCATTCTTAGCAGCCATTGCTTG  
CCTGAAGTTCCTCATCGAAGGCTTGGGGCCTTGTTAAATTGGTGGCACACG  
CCTTAATCTCAGCACTCGGGAGGCAGAGGCAGAAGCAGGTGGATTTCTGAG  
TTTGAGGCCAGCCTGGTCTACAAAGTGAGTTCAGGACTGCCAGGGCTATA  
CAGAGAAAAGTCTGTATCGAAAAACAAAAACAAAAACAAAAACAAAAA  
AAAAATTTACCCATCCATGTTGGGATATTTCTGGTGTGGTCTTGTATAGGT  
CTAATGTGGGCAAGCCATTGTTGAGAGCTCATGGGTGCAGCATCTCTGTCA  
TGTCTGGAAGACACTATCTCATAGCAGTTGTCTGGTCGTCTGGCCCCCAGA  
GTCTTTCTGCCTCTTTCCTTTATGTTACTTGAGCATTGGGTATAGCAGTTGTG  
TTATAAATGTCCTAATAGGGTCTGGGCTCCTCACAGTACTTCTCTCTGCC  
TTTTTGACCAGTTATGGATCGCTATAAGTAGTTTCTACTGCAAAAAGACACTT  
CATAGTGGAGGGTGAGAACAGTACTTACCCAGAGAGCATTGGCACAGCTGT  
CATCTGGCCACACCCAGCATTTCCTTGGTCTTGTCTCAGGTCTTATG  
CTTGCAAGGCAAATACCTTACCAACCGAGTGTCCATATAATCTTTGTTTGT  
GAGACAGGGTCTCTCTTTGTAGTCTTGACTGTTCTGGACTTCAGTATGTAGA  
CCAGGTAGACCAAACCTTGAATTCACAGAGCTCCACCTGGCACTGCTTCTC  
AAGTGCTGGGATTAAAGGCATTTGCCACTACGTTACGCATAATATACTCT

TAATAAAGATTTATTGTATAGGAGGCTAGGAATAGGTCTTCTTCCAGGTCCA  
GTTATACCACTCTTGAACATATACTCGAAGGACTTTATATCCTACTACAGAG  
GCATATGCTCATTGTGTTTATTGCTGCTCTATAAACAATAACCAGAATTTGG  
AAACAGCCTAGATGTCCATCAACAGATAAATGGATAATGAAAATGTGGTACA  
TTTATACAATGGAATATTACTCTGCTGTTAAAAGAAATGAAATCATGAAACTC  
TCAGGTAATGGATGAAGATAGGAAAAAAATTCATCCCGAGTGAGGTAATA  
CAGACCCCAAAGACAAACATGGTATGCATTCTCTTTTGTGTGGATGTTAGC  
TTTTAAGCTTTCAATAGACATGCTGCAGAGGTTAGGCATAAAGGGCTAGAGG  
ACTGGGAATGGGGAAATAGAATATATTTCTAGTTATGGAAAGATGTGGAGG  
GGAGTCTAGAATGGAGAGGGGACATAAGGGGGTAAGGAGTGGGATACAGA  
GATGGACAGCTAACACTAAGGGCCATTTGAGGGGTCATATGGAAATCTACT  
ATAGTACAAGCTTCTTAAAATATATTCATATACAAAATAAATCTAAATGACATC  
ACTAAACAACAGGGGAGACAAAGCCCAACCAACCAAGACATCTCCAGTGA  
AATCTCCAGTGCCAGAAATGGGTTATATAGCTTATTGAGTTGTTGGCCCAAT  
GAACCCCATGGAACCCCCCAAACAACCTCAGGATATTTCCAAGTCTATTGGTT  
GCTCTTCACAAATTGATGCTAAGGCCTTATTGTTGAAGACAACACCTATGTA  
TCTTATTGAACATGGGAAAGTCAAATTATTGCCTACCTAGAGCCTTCAGCCC  
TATTGACTAGTATGGATGGTTCCGGAAGGTAAGTCTGCAACCCAGCCACAAC  
CCTTTGATCGACAACAAAACCTGCCTGCCTGACATGCTGGCGCAATGGTG  
GCACGGAAGTCGCAAGAGTAACCAAATGTTTTTCAGATTATATTTAAGTGCG  
TTCCATGAGGTGGAGCACTGTTGAGGTAGCTAAGAATCTGAGACTAGATAC  
GCCAGGGACCTAGGGGAGAAGCTAATTCTGTTGTTCTACTACAGGAATATG  
GCAATAAACTGACTCCTAATGGCCTTCTCCTATGTACATAGATCAGTTTCTTA  
GTTAGCCATCACCAGAGAAGCTTCTCCTGCAGTAGATGGGAACAAACACA  
GAGACTCACCCTGGACAATATGCAGAAAATAAAGATATCAAACCTCTCCACT  
CACAGCTCACGAAATTATGTAGAAGAAGCAGAAAAGACTCTAAGAACCAGTG  
GGTTTCCCCCTCAATTCCCGGAATTCCTCTCAATTCCAGTTGTTTCTCCAG  
TAATTTCTTTTTGCTCCCTCCACCTGATCCCCGCCTGGTCTTCTGCAGAA  
TCTATTCTATTTCCCTGCCCTGAGAGGTCTTTTGTCCCTGCCTTAAGCCC  
TCTTTGTTACTTAGCTTCTCTAGGTCTGTATCATGACTGTCTTT**ATCCACTA**  
**ATATTAGCTAAT**ATCCACTTATAAGTGAGCATATATCATATTTGTTTTCTGG  
GTCTCGGTTACC
