# Supplementary material for: MEF2C and EBF1 Co-regulate B Cell-Specific Transcription
Source: PubMed Central journal article supplement (PMC4762780; doi:10.1371/journal.pgen.1005845), 2016-02-22
Supplement: pgen.1005845.s012.pdf [file pgen.1005845.s012.pdf]

| <b>Gene</b>    | <b>Forward</b>           | <b>Reverse</b>          |
|----------------|--------------------------|-------------------------|
| <i>Mef2c-1</i> | AAGAAACACGGGGACTATGG     | ACAGCTTGTTGGTGCTGTTG    |
| <i>Mef2c-2</i> | GTGCTGTGCGACTGTGAGAT     | TTGAGGCCCTTCTTTCTCAA    |
| <i>Mef2c-3</i> | CGAGGATAATGGATGAGCGTA    | CATGTCAGTGCTGGCGTACT    |
| <i>Ebf1-1</i>  | CCCTCCAACCTGCAGTAGCTC    | TTTCACATGGGAGGGACAAT    |
| <i>Myb</i>     | TGTCCTCAAAGCCTTTACCG     | CCGTCATCTGGTCCTCTGTC    |
| <i>Ets1</i>    | ATCCAGCTGTGGCAGTTTCT     | CCACGGCTCAGTTTCTCATA    |
| <i>Flt3</i>    | GAACCCTTACCCTGGCATTG     | TCAGGTTGGGGAAGGATG      |
| <i>Foxo1</i>   | TCCTGGGCCAAAATGTAATG     | GGTTCATGGCAGATGTGTGA    |
| <i>Cxcl9</i>   | TTTTCTCTTGGGCATCATC      | TGTTGCAATTGGGGCTTG      |
| <i>Csf2ra</i>  | GACACGAGGATGAAGCACTG     | GAACCTCCTGCACGTCACTC    |
| <i>Csf3r</i>   | GTAGCCTGAGCTCCTGGTTG     | GGCTACCATTCCAGAGCTT     |
| <i>Csf1r</i>   | CTGGGAGATCTTCTCGCTTG     | TCTGTTGGAAGGTGGGTCTT    |
| <i>Rag1</i>    | TTTCACAAAACCTTGGCACA     | CAGCCAGTGATGTTTCAGGA    |
| <i>Il7ra</i>   | GCCTAGTCTCCCCGATCATA     | TCTCCAACCTCTGGCTGT      |
| <i>Sfp1</i>    | GAGAAGCTGATGGCTTGGAG     | GCTTGGACGAGAACTGGAAG    |
| <i>C/ebpa</i>  | GGGACCATTAGCCTTGTGTG     | AGCATAGACGTGCACACTGC    |
| <i>Gapdh</i>   | TGTGCAGTGCCAGCCTCGTC     | TGAAGGGGTCGTTGATGGCAACA |
| <i>RNP</i>     | TTGCAGGAAGAAGAGAGAGAGAGG | TGCCAAAGTCCAGGAGCTTCAG  |
| <i>Bcl11b</i>  | GACTCAGGGTGAGGGTCAGA     | AAGCCATGTGTGTTCTGTGC    |
| <i>Pou2af1</i> | CCAGCCTGGCTTTGAACTTA     | CGAGTCTGTAGTGCCTGCTG    |
| <i>Jun</i>     | TATTTTGGGGAGCATTGGA      | CTCTGGGTCAGGAAAGTTGC    |
